# Supplementary material for: Implementation of an Opioid Weaning Protocol at a Tertiary Care Children’s Hospital
Source: Oxford University Press journal article supplement (doi:10.1542/hpeds.2021-006306), 2022-10-04
Supplement: hpeds.2021-006306supplementarydata.pdf [file hpeds.2021-006306supplementarydata.pdf]

## Supplemental Information

### APPENDIX 1 (see separate file available with the article online)

Withdrawal Assessment Tool (WAT-1)

Reprinted with permission from: Franck LS, Harris S, Soetenga D, Amling J, Curley M. The withdrawal assessment tool (WAT-1): Measuring iatrogenic withdrawal symptoms in pediatric critical care. *Pediatr Crit Care Med*. 2008;9(6):573–580

### APPENDIX 2 Standardized Pharmacist Methadone Weaning Guidelines.

#### CALCULATION OF INITIAL DOSE OF METHADONE

Fentanyl dose (mcg/kg/hr) x weight (kg) x 0.08 (conversion factor) = \_\_\_\_\_ mg of methadone q6h

Morphine dose (mg/kg/hr) x weight (kg) x 1 (conversion factor) = \_\_\_\_\_ mg of methadone q6h

Hydromorphone (mcg/kg/hr) x weight (kg) x 5 (conversion factor) = \_\_\_\_\_ mg of methadone q6h

#### TRANSITION FROM OPIOID INFUSION TO SCHEDULED METHADONE

After 2nd dose of methadone, decrease opioid infusion by 50% of original infusion  
After 3rd dose of methadone, decrease opioid infusion by 75% of original infusion  
After 4th dose of methadone, discontinue opioid infusion.

#### LOW-RISK WEAN (opioid duration of $\leq$ 15 days)

In setting of low risk opioid wean only and expected discharge within 48–72 hours post extubation, may attempt clonidine (opioid replacement) wean in clonidine section.

Enteral dosing (preferred)

Initial methadone dose \_\_\_\_\_ mg (dose from above x 1.3 for bioavailability of 70–80%)

Methadone \_\_\_\_\_ (initial dose x 1) mg po/enteral tube q6h x 8 doses

Methadone \_\_\_\_\_ (initial dose x 1) mg po/enteral tube q8h x 6 doses

Methadone \_\_\_\_\_ (initial dose x 1) mg po/enteral tube q12h x 4 doses

Methadone \_\_\_\_\_ (initial dose x 1) mg po/enteral tube q24h x 2 doses

Discontinue methadone (Total wean 6 days)

Intravenous

Initial methadone dose \_\_\_\_\_ mg (dose from above x 1)

Methadone \_\_\_\_\_ (initial dose x 1) mg IV q6h x 8 doses

Methadone \_\_\_\_\_ (initial dose x 1) mg po/enteral tube q6h x 8 doses

Methadone \_\_\_\_\_ (initial dose x 1) mg po/enteral tube q8h x 6 doses

Methadone \_\_\_\_\_ (initial dose x 1) mg po/enteral tube q12h x 4 doses

Methadone \_\_\_\_\_ (initial dose x 1) mg po/enteral tube q24h x 2 doses

Discontinue methadone (Total wean 8 days)

#### MODERATE-RISK WEAN (opioid duration of 16–30 days)

Enteral dosing (preferred)

Initial methadone dose \_\_\_\_\_ mg (dose from above x 1.3 for bioavailability of 70–80%)

Methadone \_\_\_\_\_ (initial dose x 1) mg po/enteral tube q6h x 8 doses

Methadone \_\_\_\_\_ (initial dose x 0.85) mg po/enteral tube q6h x 8 doses

Methadone \_\_\_\_\_ (initial dose x 0.85) mg po/enteral tube q8h x 6 doses

Methadone \_\_\_\_\_ (initial dose x 0.7) mg po/enteral tube q8h x 6 doses

Methadone \_\_\_\_\_ (initial dose x 0.6) mg po/enteral tube q8h x 6 doses

Methadone \_\_\_\_\_ (initial dose x 0.45) mg po/enteral tube q8h x 6 doses

Methadone \_\_\_\_\_ (initial dose x 0.45) mg po/enteral tube q12h x 4 doses

Methadone \_\_\_\_\_ (initial dose x 0.3) mg po/enteral tube q12h x 4 doses

Methadone \_\_\_\_\_ (initial dose x 0.3) mg po/enteral tube q24h x 2 doses

Discontinue methadone (Total wean 16 days)

Intravenous dosing

Initial methadone dose \_\_\_\_\_ mg (dose from above x 1.3 for bioavailability of 70–80%)

Methadone \_\_\_\_\_ (initial dose x 1) mg IV q6h x 8 doses

Methadone \_\_\_\_\_ (initial dose x 1) mg po/enteral tube q6h x 8 doses

Methadone \_\_\_\_\_ (initial dose x 0.85) mg po/enteral tube q6h x 8 doses

Methadone \_\_\_\_\_ (initial dose x 0.85) mg po/enteral tube q8h x 6 doses

Methadone \_\_\_\_\_ (initial dose x 0.7) mg po/enteral tube q8h x 6 doses

Methadone \_\_\_\_\_ (initial dose x 0.6) mg po/enteral tube q8h x 6 doses

Methadone \_\_\_\_\_ (initial dose x 0.45) mg po/enteral tube q8h x 6 doses

Methadone \_\_\_\_\_ (initial dose x 0.45) mg po/enteral tube q12h x 4 doses

Methadone \_\_\_\_\_ (initial dose x 0.3) mg po/enteral tube q12h x 4 doses

Methadone \_\_\_\_\_ (initial dose x 0.3) mg po/enteral tube q24h x 2 doses

Discontinue methadone (Total wean 18 days)

#### HIGH-RISK WEAN (opioid duration $\geq$ 31 days)

Enteral dosing (preferred)

Initial methadone dose \_\_\_\_\_ mg (dose from above x 1.3 for bioavailability of 70–80%)

Methadone \_\_\_\_\_ (initial dose x 1) mg po/enteral tube q6h x 8 doses

Methadone \_\_\_\_\_ (initial dose x 0.9) mg po/enteral tube q6h x 8 doses

Methadone \_\_\_\_\_ (initial dose x 0.8) mg po/enteral tube q6h x 8 doses

Methadone \_\_\_\_\_ (initial dose x 0.7) mg po/enteral tube q6h x 8 doses

Methadone \_\_\_\_\_ (initial dose x 0.7) mg po/enteral tube q8h x 6 doses

Methadone \_\_\_\_\_ (initial dose x 0.6) mg po/enteral tube q8h x 6 doses

|                                                                           |                                                                                             |                                                                           |
|---------------------------------------------------------------------------|---------------------------------------------------------------------------------------------|---------------------------------------------------------------------------|
| Methadone _____ (initial dose x 0.5) mg<br>po/enteral tube q8h x 6 doses  | Intravenous dosing                                                                          | Methadone _____ (initial dose x 0.6) mg<br>po/enteral tube q8h x 6 doses  |
| Methadone _____ (initial dose x 0.4) mg<br>po/enteral tube q8h x 6 doses  | Initial methadone dose _____ mg (dose<br>from above x 1.3 for bioavailability of<br>70–80%) | Methadone _____ (initial dose x 0.5) mg<br>po/enteral tube q8h x 6 doses  |
| Methadone _____ (initial dose x 0.4) mg<br>po/enteral tube q12h x 4 doses | Methadone _____ (initial dose x 1) mg IV<br>q6h x 8 doses                                   | Methadone _____ (initial dose x 0.4) mg<br>po/enteral tube q8h x 6 doses  |
| Methadone _____ (initial dose x 0.3) mg<br>po/enteral tube q12h x 4 doses | Methadone _____ (initial dose x 0.9) mg<br>IV q6h x 8 doses                                 | Methadone _____ (initial dose x 0.4) mg<br>po/enteral tube q12h x 4 doses |
| Methadone _____ (initial dose x 0.2) mg<br>po/enteral tube q12h x 4 doses | Methadone _____ (initial dose x 0.8) mg<br>IV q6h x 8 doses                                 | Methadone _____ (initial dose x 0.3) mg<br>po/enteral tube q12h x 4 doses |
| Methadone _____ (initial dose x 0.1) mg<br>po/enteral tube q12h x 4 doses | Methadone _____ (initial dose x 0.7) mg<br>IV q6h x 8 doses                                 | Methadone _____ (initial dose x 0.2) mg<br>po/enteral tube q12h x 4 doses |
| Methadone _____ (initial dose x 0.1) mg<br>po/enteral tube q24h x 2 doses | Methadone _____ (initial dose x 0.7) mg<br>po/enteral tube q6h x 8 doses                    | Methadone _____ (initial dose x 0.1) mg<br>po/enteral tube q12h x 2 doses |
| Discontinue methadone<br>(Total wean 24 days)                             | Methadone _____ (initial dose x 0.7) mg<br>po/enteral tube q8h x 6 doses                    | Methadone _____ (initial dose x 0.1) mg<br>po/enteral tube q24h x 2 doses |
|                                                                           |                                                                                             | Discontinue methadone<br>(Total wean 26 days)                             |
