# Supplementary material for: Implementation of an Opioid Weaning Protocol at a Tertiary Care Children’s Hospital
Source: Oxford University Press journal article supplement (doi:10.1542/hpeds.2021-006306), 2022-10-04
Supplement: hpeds_2021006306_as-is_si.pdf [file hpeds_2021006306_as-is_si.pdf]

## WITHDRAWAL ASSESSMENT TOOL VERSION 1 (WAT – 1)

© 2007 L.S. Franck and M.A.Q. Curley. All Rights reserved. Reproduced only by permission of Authors.

|                                                           |                                                                                                |              |  |  |  |  |  |  |  |  |  |  |  |  |  |
|-----------------------------------------------------------|------------------------------------------------------------------------------------------------|--------------|--|--|--|--|--|--|--|--|--|--|--|--|--|
| <b>Patient Identifier</b>                                 |                                                                                                |              |  |  |  |  |  |  |  |  |  |  |  |  |  |
|                                                           |                                                                                                | <b>Date:</b> |  |  |  |  |  |  |  |  |  |  |  |  |  |
|                                                           |                                                                                                | <b>Time:</b> |  |  |  |  |  |  |  |  |  |  |  |  |  |
| <b>Information from patient record, previous 12 hours</b> |                                                                                                |              |  |  |  |  |  |  |  |  |  |  |  |  |  |
| <b>Any loose /watery stools</b>                           | No = 0<br>Yes = 1                                                                              |              |  |  |  |  |  |  |  |  |  |  |  |  |  |
| <b>Any vomiting/wretching/gagging</b>                     | No = 0<br>Yes = 1                                                                              |              |  |  |  |  |  |  |  |  |  |  |  |  |  |
| <b>Temperature &gt; 37.8°C</b>                            | No = 0<br>Yes = 1                                                                              |              |  |  |  |  |  |  |  |  |  |  |  |  |  |
| <b>2 minute pre-stimulus observation</b>                  |                                                                                                |              |  |  |  |  |  |  |  |  |  |  |  |  |  |
| <b>State</b>                                              | SBS <sup>1</sup> ≤ 0 or asleep/awake/calm = 0<br>SBS <sup>1</sup> > +1 or awake/distressed = 1 |              |  |  |  |  |  |  |  |  |  |  |  |  |  |
| <b>Tremor</b>                                             | None/mild = 0<br>Moderate/severe = 1                                                           |              |  |  |  |  |  |  |  |  |  |  |  |  |  |
| <b>Any sweating</b>                                       | No = 0<br>Yes = 1                                                                              |              |  |  |  |  |  |  |  |  |  |  |  |  |  |
| <b>Uncoordinated/repetitive movement</b>                  | None/mild = 0<br>Moderate/severe = 1                                                           |              |  |  |  |  |  |  |  |  |  |  |  |  |  |
| <b>Yawning or sneezing</b>                                | None or 1 = 0<br>>2 = 1                                                                        |              |  |  |  |  |  |  |  |  |  |  |  |  |  |
| <b>1 minute stimulus observation</b>                      |                                                                                                |              |  |  |  |  |  |  |  |  |  |  |  |  |  |
| <b>Startle to touch</b>                                   | None/mild = 0<br>Moderate/severe = 1                                                           |              |  |  |  |  |  |  |  |  |  |  |  |  |  |
| <b>Muscle tone</b>                                        | Normal = 0<br>Increased = 1                                                                    |              |  |  |  |  |  |  |  |  |  |  |  |  |  |
| <b>Post-stimulus recovery</b>                             |                                                                                                |              |  |  |  |  |  |  |  |  |  |  |  |  |  |
| <b>Time to gain calm state (SBS<sup>1</sup> ≤ 0)</b>      | < 2min = 0<br>2 - 5min = 1<br>> 5 min = 2                                                      |              |  |  |  |  |  |  |  |  |  |  |  |  |  |
| <b>Total Score (0-12)</b>                                 |                                                                                                |              |  |  |  |  |  |  |  |  |  |  |  |  |  |

### **WITHDRAWAL ASSESSMENT TOOL (WAT – 1) INSTRUCTIONS**

- Start WAT-1 scoring from the **first day of weaning** in patients who have received opioids +/- benzodiazepines by infusion or regular dosing for prolonged periods (e.g., > 5 days). Continue twice daily scoring until 72 hours after the last dose.
- The Withdrawal Assessment Tool (WAT-1) should be completed along with the SBS<sup>1</sup> at least once per 12 hour shift (e.g., at 08:00 and 20:00 ± 2 hours). The progressive stimulus used in the SBS<sup>1</sup> assessment provides a standard stimulus for observing signs of withdrawal.

#### **Obtain information from patient record (this can be done before or after the stimulus):**

- ✓ **Loose/watery stools:** Score 1 if any loose or watery stools were documented in the past 12 hours; score 0 if none were noted.
- ✓ **Vomiting/wretching/gagging:** Score 1 if any vomiting or spontaneous wretching or gagging were documented in the past 12 hours; score 0 if none were noted
- ✓ **Temperature > 37.8°C:** Score 1 if the modal (most frequently occurring) temperature documented was greater than 37.8°C in the past 12 hours; score 0 if this was not the case.

#### **2 minute pre-stimulus observation:**

- ✓ **State:** Score 1 if awake and distress (SBS<sup>1</sup>: ≥ +1) observed during the 2 minutes prior to the stimulus; score 0 if asleep or awake and calm/cooperative (SBS<sup>1</sup> ≤ 0).
- ✓ **Tremor:** Score 1 if moderate to severe tremor observed during the 2 minutes prior to the stimulus; score 0 if no tremor (or only minor, intermittent tremor).
- ✓ **Sweating:** Score 1 if any sweating during the 2 minutes prior to the stimulus; score 0 if no sweating noted.
- ✓ **Uncoordinated/repetitive movements:** Score 1 if moderate to severe uncoordinated or repetitive movements such as head turning, leg or arm flailing or torso arching observed during the 2 minutes prior to the stimulus; score 0 if no (or only mild) uncoordinated or repetitive movements.
- ✓ **Yawning or sneezing > 1:** Score 1 if more than 1 yawn or sneeze observed during the 2 minutes prior to the stimulus; score 0 if 0 to 1 yawn or sneeze.

#### **1 minute stimulus observation:**

- ✓ **Startle to touch:** Score 1 if moderate to severe startle occurs when touched during the stimulus; score 0 if none (or mild).
- ✓ **Muscle tone:** Score 1 if tone increased during the stimulus; score 0 if normal.

#### **Post-stimulus recovery:**

- ✓ **Time to gain calm state (SBS<sup>1</sup> ≤ 0):** Score 2 if it takes greater than 5 minutes following stimulus; score 1 if achieved within 2 to 5 minutes; score 0 if achieved in less than 2 minutes.

#### **Sum the 11 numbers in the column for the total WAT-1 score (0-12).**

<sup>1</sup>Curley et al. State behavioral scale: A sedation assessment instrument for infants and young children supported on mechanical ventilation. *Pediatr Crit Care Med* 2006;7(2):107-114.
